# Supplementary material for: Unraveling energy transfer and fluorescence quenching dynamics in biomolecular complexes: a comprehensive study of imiquimod–rifampicin interaction
Source: Royal Society of Chemistry journal article supplement (doi:10.1039/d4cp02732a), 2024-01-01
Supplement: d4cp02732a1.pdf [file d4cp02732a1.pdf]

### Supporting Information

**Table S1.** Binding constant ( $K_b$ ) and thermodynamic parameters for interaction of IMQ with RIF at different temperatures.

| S.No. | T(K) | $K_b$ ( $\times 10^4 M^{-1}$ ) | $\Delta G$<br>(kJ mol <sup>-1</sup> ) | $\Delta H$<br>(kJ mol <sup>-1</sup> ) | $\Delta S$<br>(J mol <sup>-1</sup> K <sup>-1</sup> ) |
|-------|------|--------------------------------|---------------------------------------|---------------------------------------|------------------------------------------------------|
| 1     | 298  | 7.29                           | -27.8                                 | -41.77                                | -46.90                                               |
| 2     | 303  | 5.88                           | -27.56                                |                                       |                                                      |
| 3     | 308  | 4.34                           | -27.33                                |                                       |                                                      |
| 4     | 313  | 3.26                           | -27.09                                |                                       |                                                      |

**Table S2.** Fluorescence decay transients of IMQ on gradual addition of RIF. The excitation wavelengthis  $\lambda_{\text{ex}} = 291 \text{ nm}$ .  $\tau_{\text{av}} = (\tau_1 \times \alpha_1) + (\tau_2 \times \alpha_2) / (\alpha_1 + \alpha_2)$ 

| Sample                     | $\lambda_{\text{em}}$ | $\tau_1$ (ns) | $\alpha_1$ | $\tau_2$ (ns) | $\alpha_2$ | $\tau_{\text{av}}$ (ns) | $\chi^2$ |
|----------------------------|-----------------------|---------------|------------|---------------|------------|-------------------------|----------|
| IMQ only                   | 320<br>nm             | 1.5           | 84         | 3.5           | 16         | 1.85                    | 1.5      |
| IMQ + RIF 20 $\mu\text{M}$ |                       | 1.6           | 85         | 3.7           | 15         | 1.89                    | 1.25     |
| IMQ + RIF 39 $\mu\text{M}$ |                       | 1.7           | 85         | 4             | 15         | 2.02                    | 1.49     |
| IMQ only                   | 350<br>nm             | 1.5           | 65         | 3.9           | 35         | 2.3                     | 1.3      |
| IMQ + RIF 20 $\mu\text{M}$ |                       | 1.57          | 66         | 3.9           | 34         | 2.4                     | 1.14     |
| IMQ + RIF 39 $\mu\text{M}$ |                       | 1.57          | 65         | 3.9           | 35         | 2.4                     | 1.26     |
| IMQ only                   | 370<br>nm             | 1.5           | 59         | 3.9           | 41         | 2.5                     | 1.17     |
| IMQ + RIF 20 $\mu\text{M}$ |                       | 1.5           | 57         | 3.9           | 43         | 2.5                     | 1.18     |
| IMQ + RIF 39 $\mu\text{M}$ |                       | 1.6           | 59         | 4             | 41         | 2.55                    | 1.1      |

**Table S3.** Optimized energies of Non-ionic and Zwitter ionic forms of RIF. In case of Zwitterionic form, we removed hydrogen from hydroxyl groups and placed at N12 or N56. The highlighted is the most stable among all structural isomers.

| Complex                          | <sup>1</sup> N12 (Without PCM) | <sup>2</sup> N12 (PCM) | <sup>3</sup> N56 (PCM) |
|----------------------------------|--------------------------------|------------------------|------------------------|
| RIF <sub>Non-ionic</sub>         | -2795.879834                   | -2795.925947           | -2795.925947           |
| O51                              | -2795.847019                   | -2795.897676           | -2795.904811           |
| <b>O52(RIF<sub>Zwitt.</sub>)</b> | <b>-2795.898564</b>            | <b>-2795.942526</b>    | <b>-2795.941415</b>    |
| O14                              | -2795.871932                   | -2795.919611           | -2795.892875           |
| O27                              | -2795.870692                   | -2795.864767           | -2795.892873           |
| O31                              | -2795.870693                   | -2795.912363           | -2795.878313           |

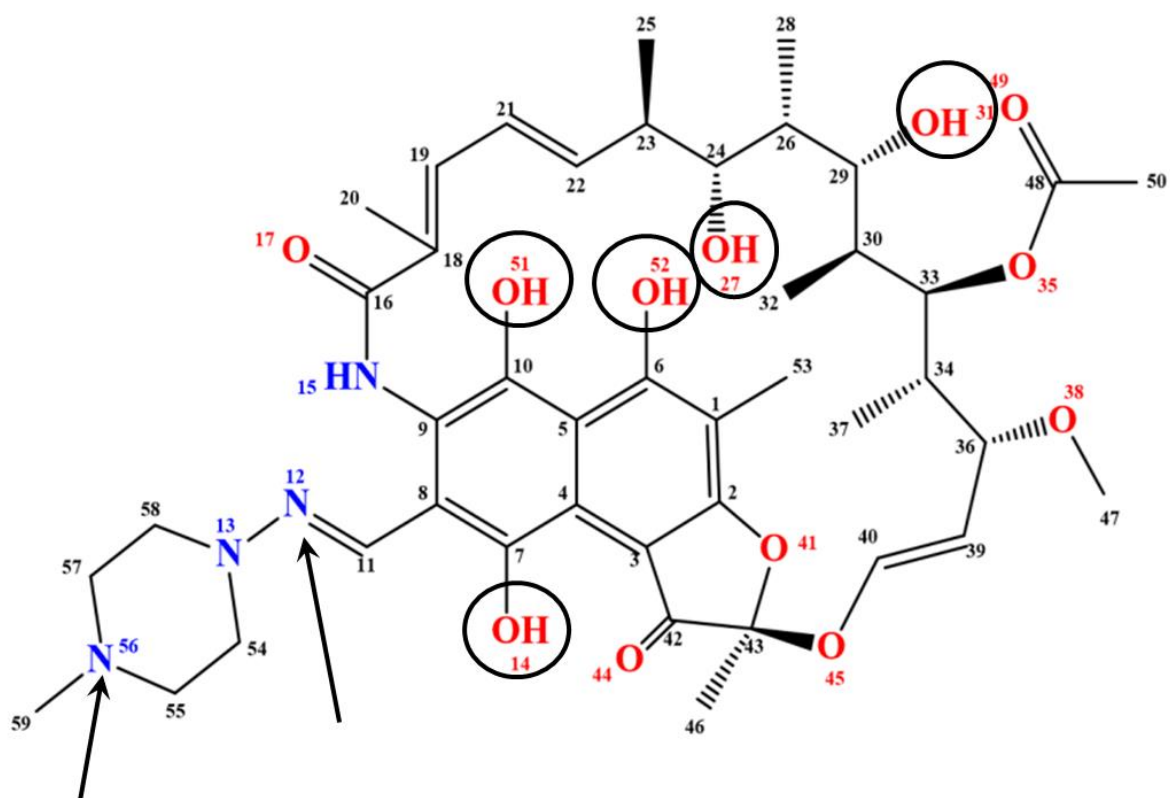

<sup>1</sup> First column represents energies of zwitter ionic form of RIF deprotonated from encircled oxygens 51, 52, 14, 27, 31 and protonated on nitrogen 12 (-N=NH<sup>+</sup>) as shown in the figure.

<sup>2</sup> Second column represents calculations on first column with PCM model.

<sup>3</sup> Third column denotes same deprotonation but protonation on nitrogen at 56 position.

**Table S4.** Estimation of orientation factor ( $k^2$ ) and energy transfer rates ( $k_{ET}$ ) from MD simulation.

| Complexes    | Mean Distance, Å | Estimated Forster radius, $R_0$ , Å | Orientation factor, $k^2$ | Estimated energy transfer rate, $k_{ET}$ ( $\times 10^9 s^{-1}$ ) |
|--------------|------------------|-------------------------------------|---------------------------|-------------------------------------------------------------------|
| COM-ZWR:IMQ  | 9.091            | 13.99                               | 0.03786                   | 5.01                                                              |
| RING-ZWR:IMQ | 14.44            | 22.22                               | 0.21474                   | 5.01                                                              |
| ANSA-ZWR:IMQ | 12.29367         | 18.91                               | 0.11732                   | 4.99                                                              |
| COM-NIR:IMQ  | 6.4417           | 9.91                                | 0.01846                   | 5                                                                 |
| RING-NIR:IMQ | 10.3514          | 15.92                               | 0.10995                   | 4.99                                                              |
| ANSA-NIR:IMQ | 9.45353          | 14.5439                             | 0.057                     | 5                                                                 |

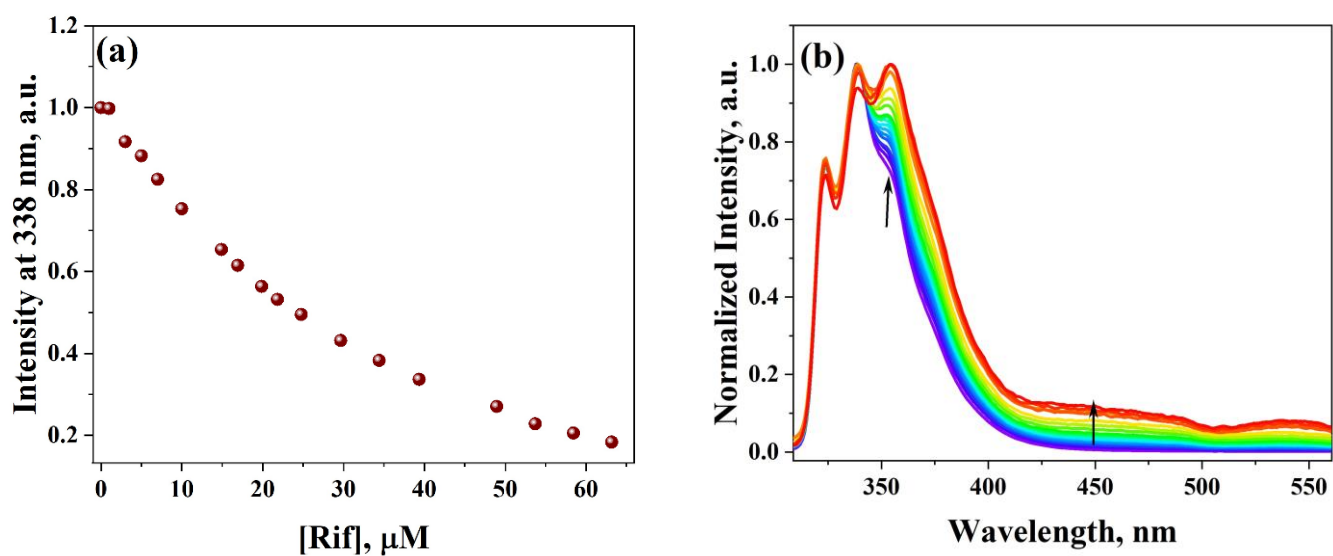

**Fig. S1.** (a) Relative change in fluorescence intensity of IMQ at 338 nm and (b) normalized emission spectra of IMQ (0.75  $\mu\text{M}$ ) in the presence of RIF (1  $\mu\text{M}$  to 63  $\mu\text{M}$ ) in PBS (pH = 7.4).

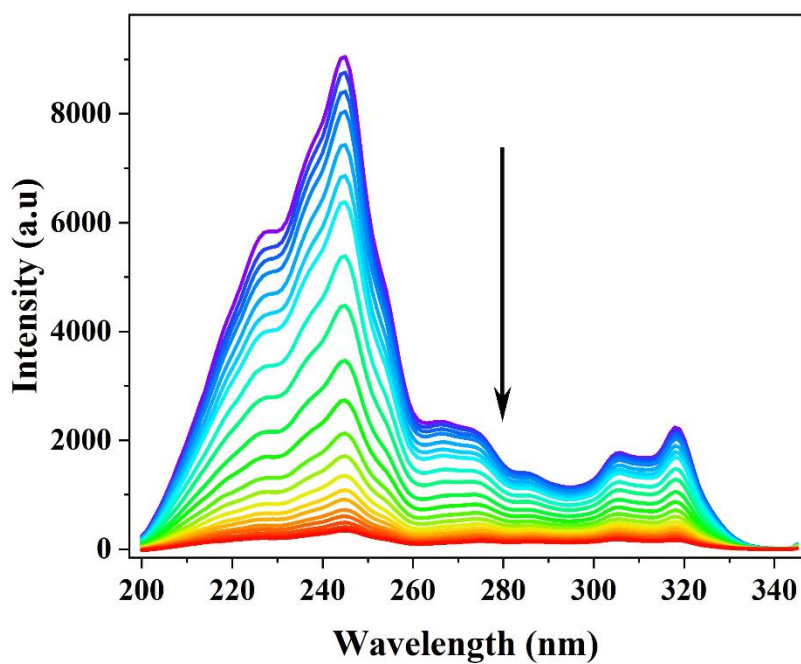

**Fig. S2.** Steady state excitation spectra of IMQ in the presence of RIF (1.6  $\mu\text{M}$  to 49.8  $\mu\text{M}$ ) in PBS (pH = 7.4). Emission wavelength is 350 nm. Arrow indicates the direction of increasing concentration of RIF.

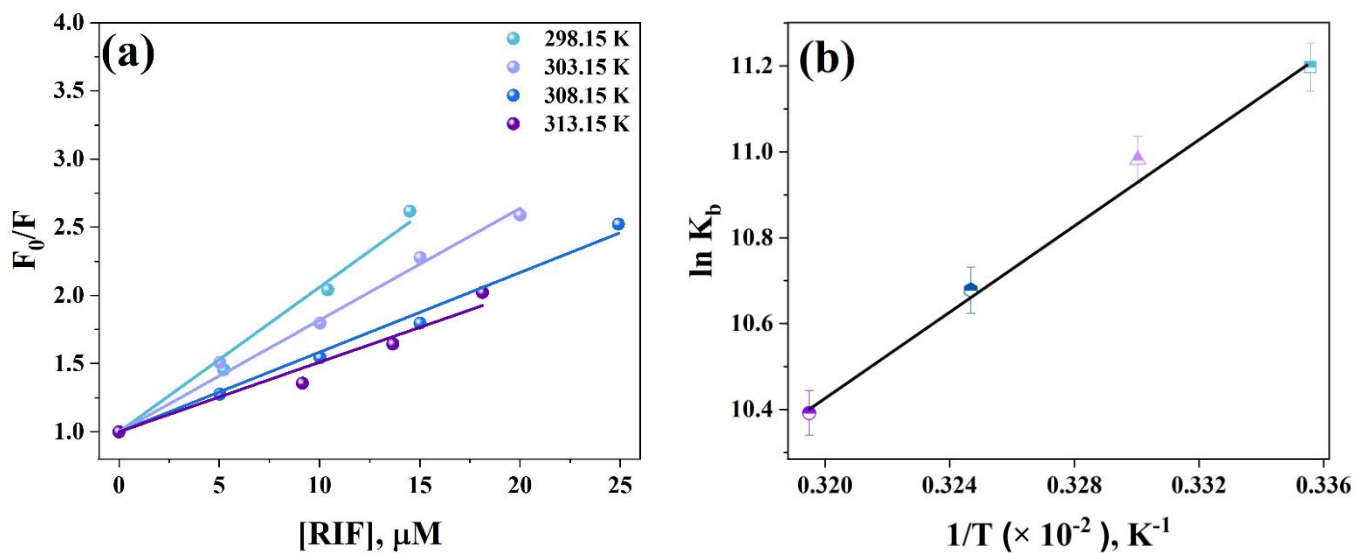

**Fig. S3.** (a) Stern-Volmer plot and (b) Van't Hoff plot of RIF induced quenching in IMQ at 298, 303, 308 and 313K temperatures and at pH = 7.4.

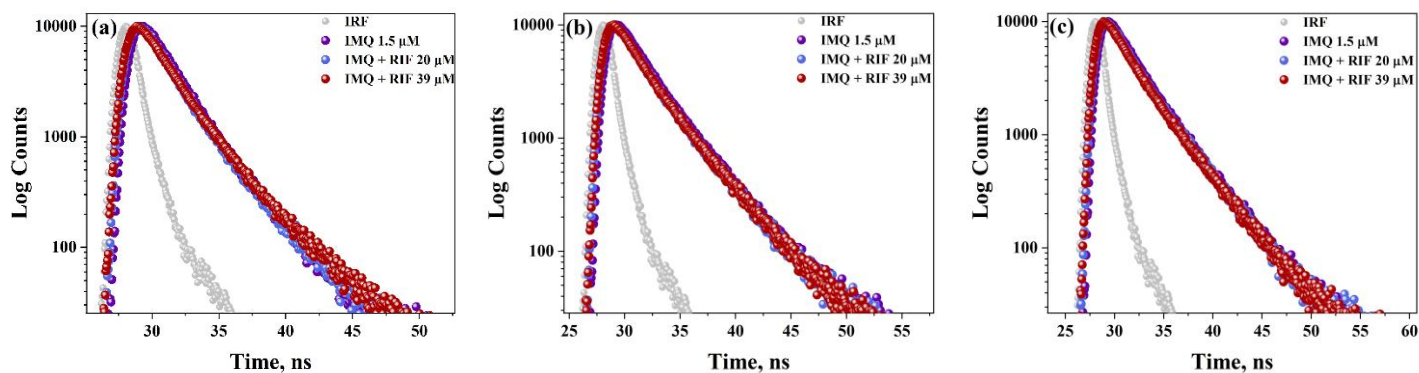

**Fig. S4.** Fluorescence decay transients of IMQ in absence and presence of RIF at  $\lambda_{\text{ex}} = 290 \text{ nm}$  and (a)  $\lambda_{\text{em}} = 320 \text{ nm}$  (b)  $\lambda_{\text{em}} = 350 \text{ nm}$  (c)  $\lambda_{\text{em}} = 370 \text{ nm}$  at pH = 7.4.

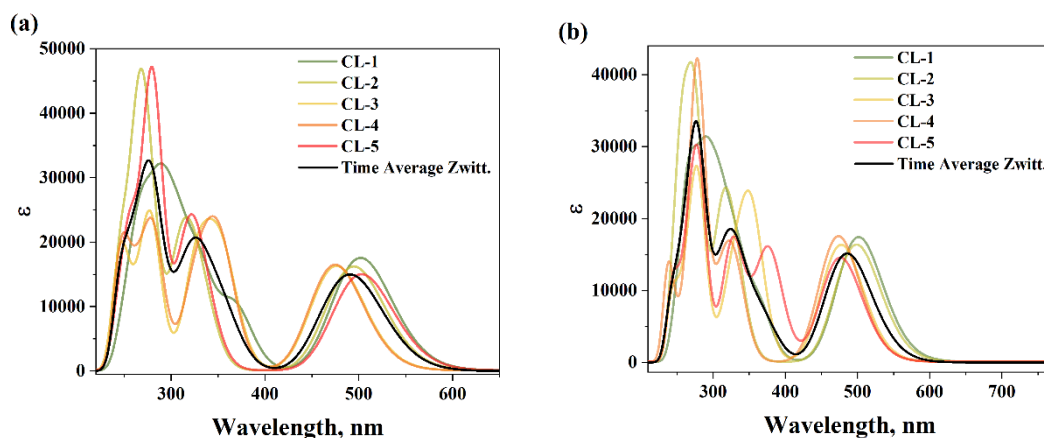

**Fig. S5.** Absorption spectra computed (CAM-B3LYP functional) from SP (a) and optimized geometries (b) collected from the MD simulation trajectories of RIF<sub>Zwitt.</sub>-IMQ.

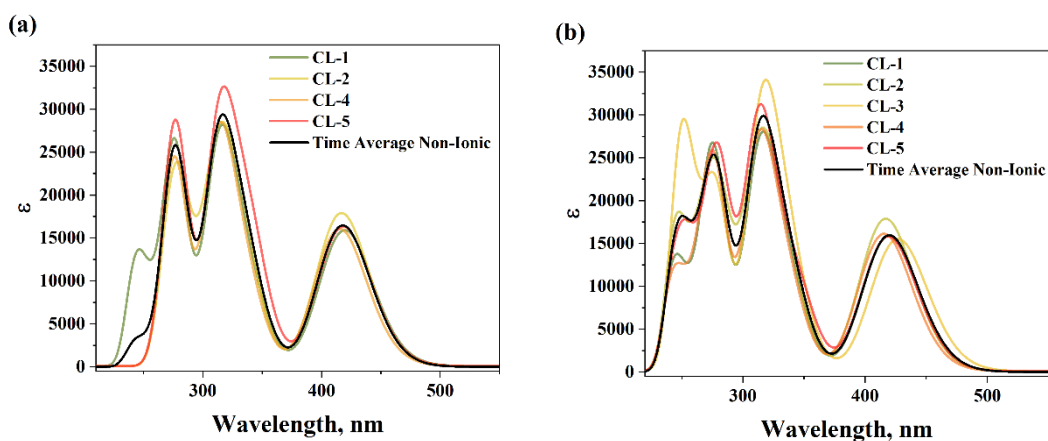

**Fig. S6.** Absorption spectra computed (CAM-B3LYP functional) from SP (a) and optimized geometries (b) collected from the MD simulation trajectories of RIF<sub>Non-ionic</sub>-IMQ.



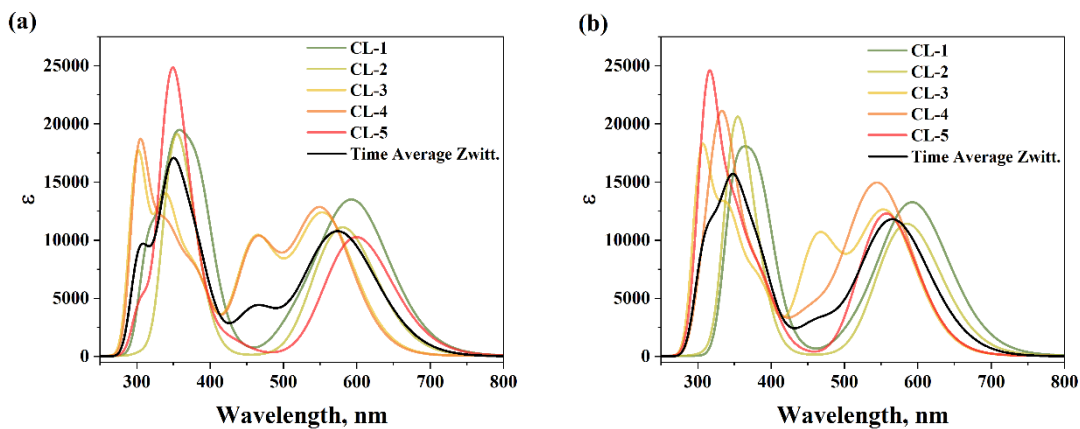

**Fig. S7.** Absorption spectra computed (B3LYP functional) from SP (a) and optimized geometries (b) collected from the MD simulation trajectories of RIF<sub>Zwitt.</sub>-IMQ.

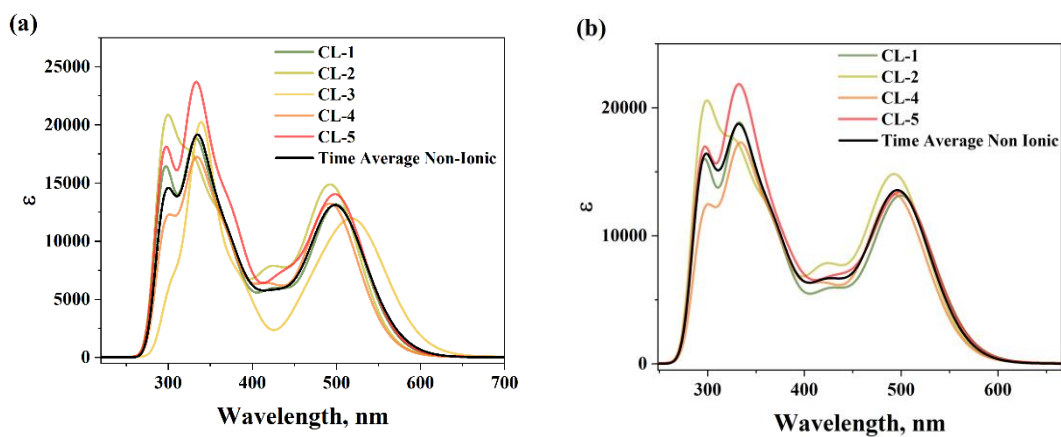

**Fig. S8.** Absorption spectra computed (B3LYP functional) from SP (a) and optimized geometries (b) collected from the MD simulation trajectories of RIF<sub>Non-ionic</sub>-IMQ.

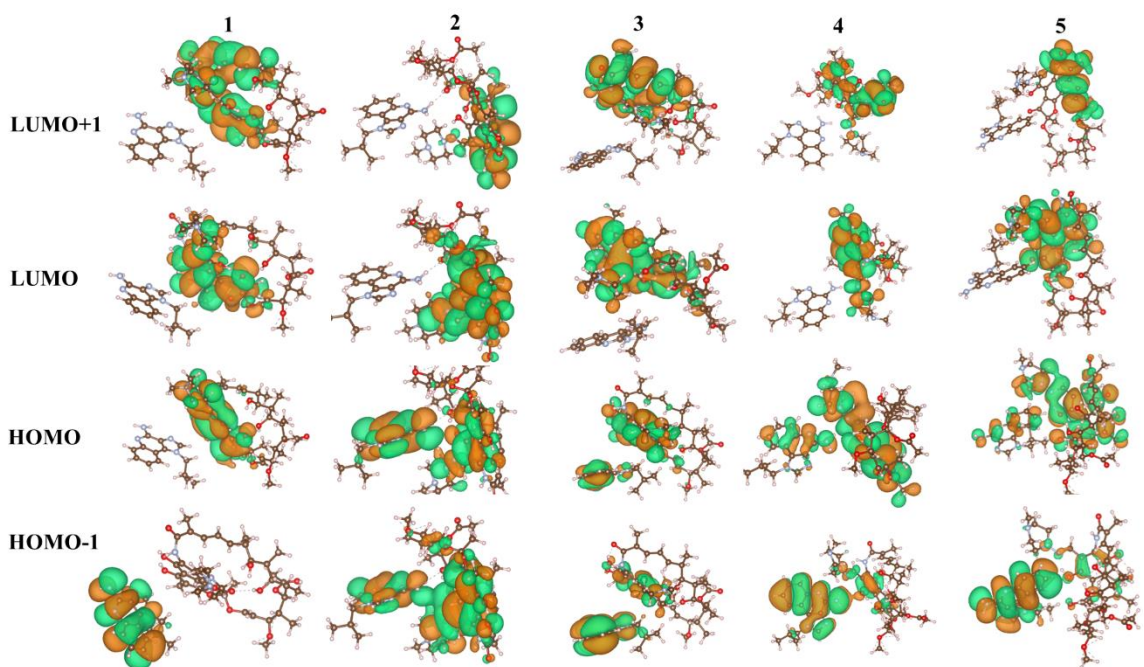

**Fig. S9.** Molecular Orbital Diagram in MD simulation snapshots for RIF<sub>Non-ionic</sub>-IMQ complex.

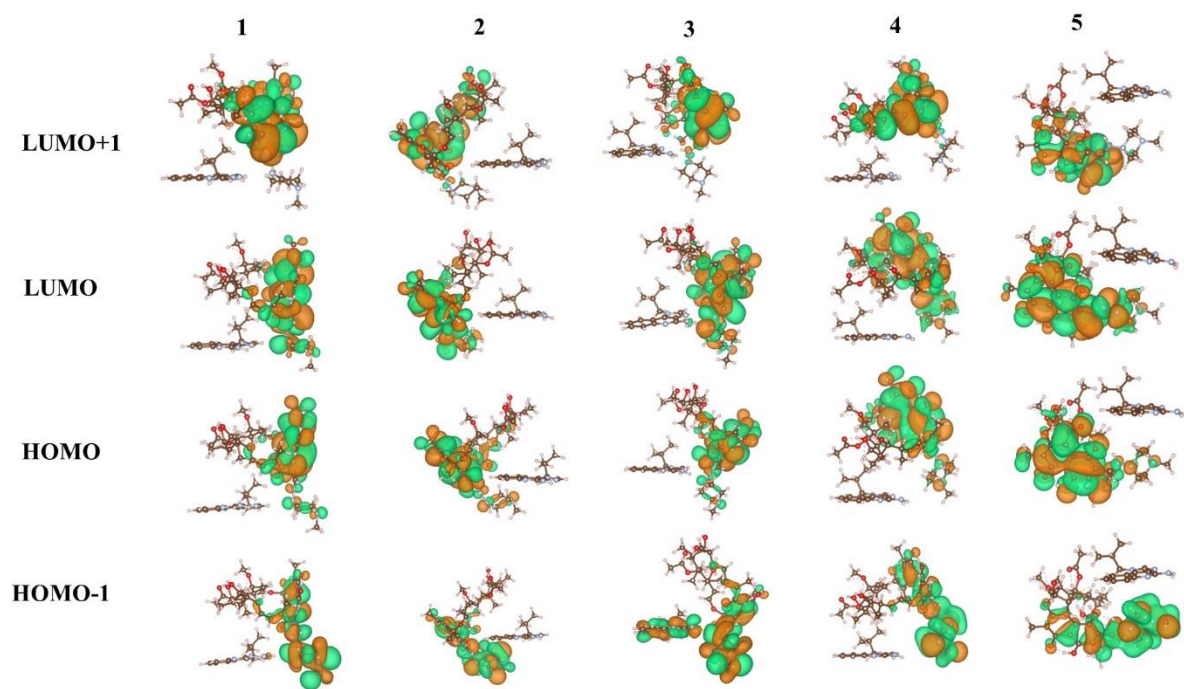

Fig. S10. Molecular Orbital Diagram in MD simulation snapshots for RIF<sub>Zwitt.</sub>-IMQ complex.

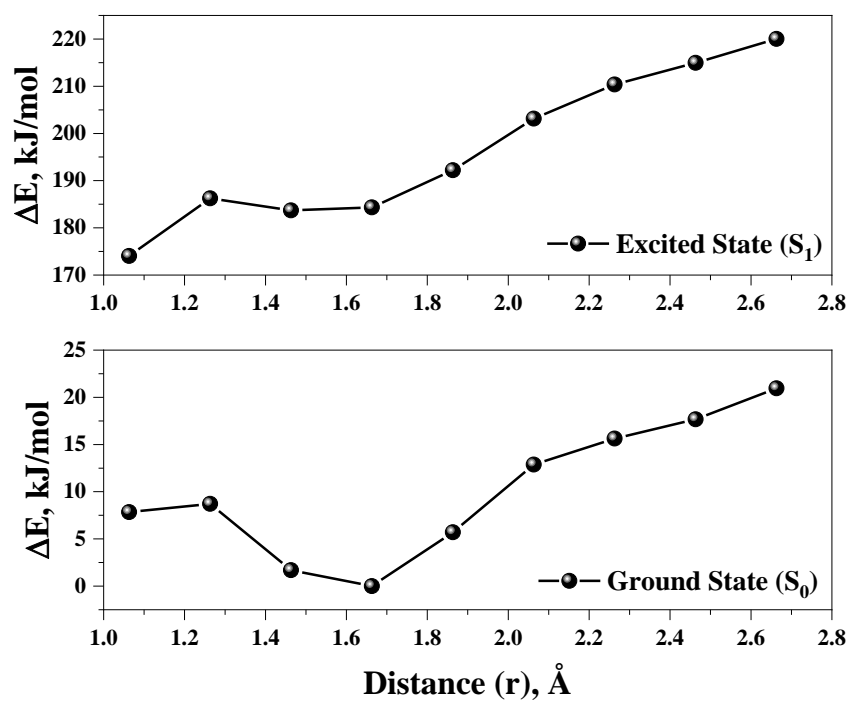

Fig. S12. Potential Energy Scan (PES) for proton transfer from RIF to IMQ.

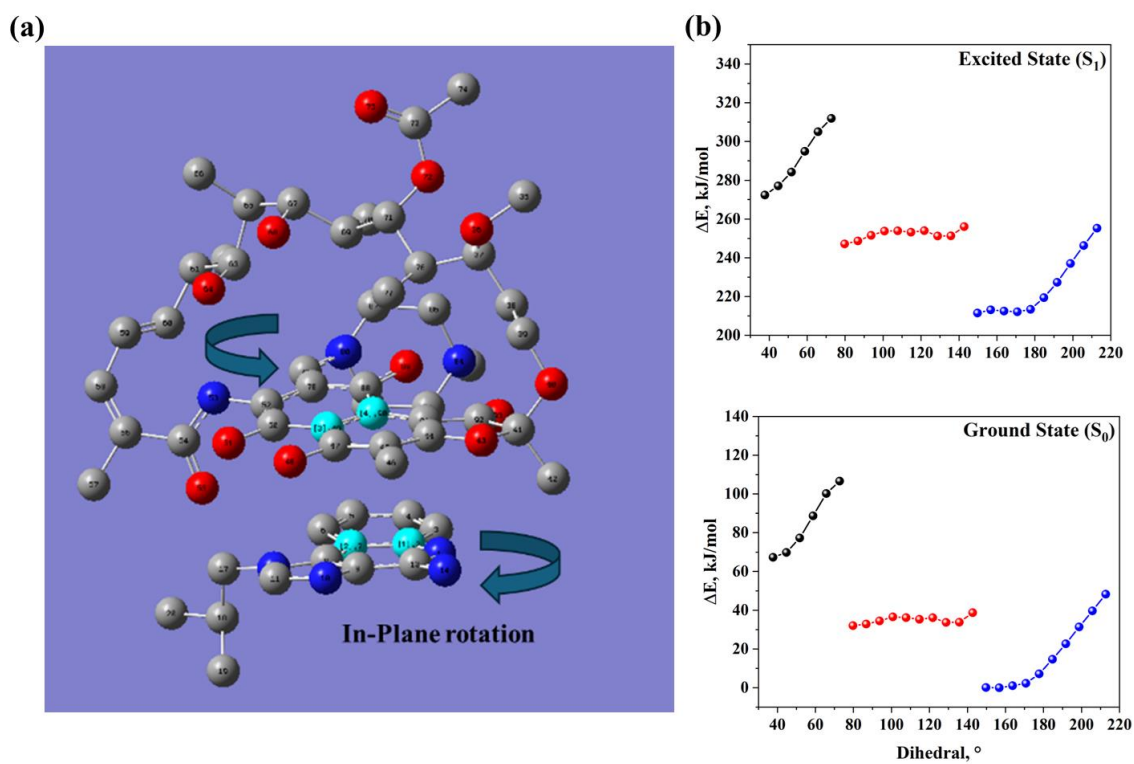

**Fig. S13.** Potential Energy Scan (PES) for dihedral angle during the in-plane rotation of IMQ with respect to RIF.
